# Supplementary material for: The Demand for Elective Neurosurgery at a German University Hospital during the First Wave of COVID-19
Source: MDPI journal article supplement (doi:10.3390/healthcare8040483), 2020-11-13
Supplement: s1 [file s1]

Tabelle1

| day | outpatients_2019 | outpatients_2020 | cancellations_2020 |
|-----|------------------|------------------|--------------------|
| 1   | 2                | 1                | NA                 |
| 2   | 33               | 22               | NA                 |
| 3   | 34               | 35               | NA                 |
| 4   | 34               | 0                | NA                 |
| 5   | 0                | 3                | NA                 |
| 6   | 1                | 53               | NA                 |
| 7   | 49               | 55               | NA                 |
| 8   | 51               | 44               | NA                 |
| 9   | 30               | 46               | NA                 |
| 10  | 41               | 43               | NA                 |
| 11  | 25               | 4                | NA                 |
| 12  | 3                | 2                | NA                 |
| 13  | 1                | 53               | NA                 |
| 14  | 41               | 45               | NA                 |
| 15  | 58               | 38               | NA                 |
| 16  | 28               | 47               | NA                 |
| 17  | 45               | 35               | NA                 |
| 18  | 48               | 0                | NA                 |
| 19  | 1                | 3                | NA                 |
| 20  | 0                | 45               | NA                 |
| 21  | 41               | 47               | NA                 |
| 22  | 57               | 47               | NA                 |
| 23  | 39               | 38               | NA                 |
| 24  | 54               | 32               | NA                 |
| 25  | 50               | 4                | NA                 |
| 26  | 5                | 4                | NA                 |
| 27  | 4                | 42               | NA                 |
| 28  | 40               | 42               | NA                 |
| 29  | 46               | 46               | NA                 |
| 30  | 31               | 36               | NA                 |
| 31  | 39               | 38               | NA                 |
| 32  | 32               | 2                | NA                 |
| 33  | 1                | 1                | NA                 |
| 34  | 1                | 39               | NA                 |
| 35  | 32               | 31               | NA                 |
| 36  | 33               | 35               | NA                 |
| 37  | 25               | 39               | NA                 |
| 38  | 36               | 24               | NA                 |
| 39  | 28               | 5                | NA                 |
| 40  | 2                | 1                | NA                 |
| 41  | 1                | 32               | NA                 |
| 42  | 38               | 32               | NA                 |
| 43  | 34               | 31               | NA                 |
| 44  | 31               | 41               | NA                 |
| 45  | 35               | 24               | NA                 |
| 46  | 32               | 4                | NA                 |
| 47  | 4                | 0                | NA                 |
| 48  | 4                | 40               | NA                 |
| 49  | 33               | 44               | NA                 |
| 50  | 36               | 26               | NA                 |
| 51  | 32               | 33               | NA                 |
| 52  | 18               | 35               | NA                 |
| 53  | 23               | 4                | NA                 |
| 54  | 3                | 2                | NA                 |
| 55  | 2                | 36               | NA                 |

Tabelle1

|     |    |       |    |
|-----|----|-------|----|
| 56  | 28 | 33 NA |    |
| 57  | 44 | 36 NA |    |
| 58  | 39 | 33 NA |    |
| 59  | 33 | 31 NA |    |
| 60  | 26 | 1 NA  |    |
| 61  | 3  | 1 NA  |    |
| 62  | 2  | 31 NA |    |
| 63  | 26 | 38 NA |    |
| 64  | 39 | 33 NA |    |
| 65  | 27 | 28 NA |    |
| 66  | 22 | 23 NA |    |
| 67  | 3  | 3 NA  |    |
| 68  | 1  | 1 NA  |    |
| 69  | 32 | 33 NA |    |
| 70  | 44 | 31 NA |    |
| 71  | 27 | 36 NA |    |
| 72  | 30 | 31 NA |    |
| 73  | 33 | 27 NA |    |
| 74  | 1  | 1 NA  |    |
| 75  | 5  | 2 NA  |    |
| 76  | 41 | 32    | 13 |
| 77  | 36 | 23    | 8  |
| 78  | 24 | 28    | 3  |
| 79  | 37 | 13    | 3  |
| 80  | 37 | 22    | 4  |
| 81  | 24 | 2     | 0  |
| 82  | 1  | 2     | 0  |
| 83  | 2  | 23    | 16 |
| 84  | 25 | 18    | 15 |
| 85  | 30 | 19    | 6  |
| 86  | 30 | 27    | 3  |
| 87  | 37 | 21    | 3  |
| 88  | 26 | 1     | 0  |
| 89  | 3  | 0     | 0  |
| 90  | 3  | 21    | 9  |
| 91  | 36 | 25    | 5  |
| 92  | 40 | 13    | 2  |
| 93  | 29 | 15    | 6  |
| 94  | 40 | 23    | 3  |
| 95  | 30 | 0     | 0  |
| 96  | 1  | 0     | 0  |
| 97  | 4  | 23    | 7  |
| 98  | 36 | 26    | 0  |
| 99  | 44 | 15    | 0  |
| 100 | 33 | 27    | 0  |
| 101 | 43 | 1     | 0  |
| 102 | 26 | 2     | 0  |
| 103 | 4  | 3     | 0  |
| 104 | 3  | 2     | 0  |
| 105 | 36 | 20    | 2  |
| 106 | 45 | 24    | 0  |
| 107 | 31 | 27    | 0  |
| 108 | 37 | 21    | 3  |
| 109 | 4  | 2     | 0  |
| 110 | 3  | 0     | 0  |
| 111 | 1  | 30    | 2  |

Tabelle1

|     |    |       |   |
|-----|----|-------|---|
| 112 | 0  | 39    | 0 |
| 113 | 33 | 29    | 0 |
| 114 | 32 | 31    | 1 |
| 115 | 36 | 27    | 0 |
| 116 | 33 | 1     | 0 |
| 117 | 3  | 2     | 0 |
| 118 | 1  | 35    | 0 |
| 119 | 41 | 39    | 0 |
| 120 | 43 | 25    | 0 |
| 121 | 7  | 29    | 0 |
| 122 | 43 | 0     | 0 |
| 123 | 34 | 5     | 0 |
| 124 | 4  | 4     | 0 |
| 125 | 1  | 44    | 0 |
| 126 | 38 | 34    | 0 |
| 127 | 42 | 29    | 0 |
| 128 | 31 | 29    | 0 |
| 129 | 35 | 34    | 0 |
| 130 | 36 | 1     | 0 |
| 131 | 1  | 1     | 0 |
| 132 | 1  | 46    | 0 |
| 133 | 40 | 44    | 0 |
| 134 | 40 | 42    | 1 |
| 135 | 40 | 35    | 0 |
| 136 | 30 | 40    | 0 |
| 137 | 28 | 2     | 0 |
| 138 | 7  | 1     | 0 |
| 139 | 3  | 39 NA |   |
| 140 | 34 | 46 NA |   |
| 141 | 35 | 34 NA |   |
| 142 | 40 | 4 NA  |   |
| 143 | 34 | 27 NA |   |
| 144 | 35 | 2 NA  |   |
| 145 | 4  | 0 NA  |   |
| 146 | 1  | 44 NA |   |
| 147 | 43 | 45 NA |   |
| 148 | 42 | 40 NA |   |
| 149 | 24 | 37 NA |   |
| 150 | 2  | 39 NA |   |
| 151 | 33 | 1 NA  |   |
| 152 | 2  | 3 NA  |   |
| 153 | 3  | 4 NA  |   |
| 154 | 45 | 45 NA |   |
| 155 | 40 | 35 NA |   |
| 156 | 34 | 54 NA |   |
| 157 | 29 | 35 NA |   |
| 158 | 26 | 4 NA  |   |
| 159 | 1  | 2 NA  |   |
| 160 | 2  | 35 NA |   |
| 161 | 1  | 43 NA |   |
| 162 | 52 | 34 NA |   |
| 163 | 34 | 1 NA  |   |
| 164 | 32 | 31 NA |   |
| 165 | 25 | 4 NA  |   |
| 166 | 0  | 0 NA  |   |
| 167 | 4  | 47 NA |   |

Tabelle1

|     |    |       |
|-----|----|-------|
| 168 | 34 | 50 NA |
| 169 | 42 | 37 NA |
| 170 | 29 | 29 NA |
| 171 | 6  | 34 NA |
| 172 | 33 | 3 NA  |
| 173 | 3  | 3 NA  |
| 174 | 3  | 48 NA |
| 175 | 31 | 43 NA |
| 176 | 36 | 42 NA |
| 177 | 29 | 28 NA |
| 178 | 37 | 33 NA |
| 179 | 30 | 3 NA  |
| 180 | 0  | 2 NA  |
| 181 | 2  | 38 NA |
| 182 |    | 48 NA |
