# Supplementary material for: The Demand for Elective Neurosurgery at a German University Hospital during the First Wave of COVID-19
Source: MDPI journal article supplement (doi:10.3390/healthcare8040483), 2020-11-13
Supplement: s1 [file s1]

Tabelle1

| cranial_los_2020 | cranial_los_2019 | spinal_los_2020 | spinal_los_2019 | los_2020 | los_2019 |
|------------------|------------------|-----------------|-----------------|----------|----------|
| 5                | 5                | 5               | 7               | 5        | 5        |
| 5                | 5                | 6               | 3               | 5        | 5        |
| 6                | 15               | 6               | 14              | 6        | 15       |
| 61               | 3                | 35              | 3               | 61       | 3        |
| 6                | 10               | 19              | 15              | 6        | 10       |
| 7                | 7                | 111             | 16              | 7        | 7        |
| 8                | 6                | 27              | 3               | 8        | 6        |
| 3                | 8                | 17              | 24              | 3        | 8        |
| 5                | 42               | 8               | 47              | 5        | 42       |
| 14               | 3                | 5               | 11              | 14       | 3        |
| 18               | 4                | 25              | 8               | 18       | 4        |
| 34               | 5                | 4               | 55              | 34       | 5        |
| 5                | 5                | 3               | 12              | 5        | 5        |
| 6                | 7                | 3               | 35              | 6        | 7        |
| 6                | 14               | 10              | 16              | 6        | 14       |
| 6                | 30               | 8               | 8               | 6        | 30       |
| 4                | 6                | 36              | 36              | 4        | 6        |
| 3                | 4                | 11              | 10              | 3        | 4        |
| 8                | 4                | 17              | 6               | 8        | 4        |
| 8                | 8                | 7               | 20              | 8        | 8        |
| 23               | 4                | 28              | 15              | 23       | 4        |
| 33               | 19               | 21              | 8               | 33       | 19       |
| 6                | 8                | 16              | 18              | 6        | 8        |
| 9                | 10               | 4               | 3               | 9        | 10       |
| 9                | 36               | 36              | 3               | 9        | 36       |
| 19               | 12               | 17              | 7               | 19       | 12       |
| 30               | 7                | 32              | 5               | 30       | 7        |
| 13               | 5                | 7               | 3               | 13       | 5        |
| 21               | 14               | 12              | 3               | 21       | 14       |
| 18               | 15               |                 | 3               | 18       | 15       |
| 5                | 7                |                 | 7               | 5        | 7        |
| 7                | 11               |                 | 31              | 7        | 11       |
| 6                | 4                |                 | 4               | 6        | 4        |
| 16               | 7                |                 | 67              | 16       | 7        |
| 6                | 11               |                 | 10              | 6        | 11       |
| 20               | 25               |                 | 7               | 20       | 25       |
| 5                | 6                |                 | 4               | 5        | 6        |
| 7                | 11               |                 | 22              | 7        | 11       |
| 11               | 9                |                 | 20              | 11       | 9        |
| 44               | 6                |                 | 4               | 44       | 6        |
| 7                | 8                |                 |                 | 7        | 8        |
| 18               | 8                |                 |                 | 18       | 8        |
| 5                | 12               |                 |                 | 5        | 12       |
| 27               | 2                |                 |                 | 27       | 2        |
| 10               | 11               |                 |                 | 10       | 11       |
| 13               | 5                |                 |                 | 13       | 5        |
| 11               | 3                |                 |                 | 11       | 3        |
| 6                | 5                |                 |                 | 6        | 5        |
| 4                | 5                |                 |                 | 4        | 5        |
| 6                | 15               |                 |                 | 6        | 15       |
| 5                | 4                |                 |                 | 5        | 4        |
| 8                | 3                |                 |                 | 8        | 3        |
| 5                | 6                |                 |                 | 5        | 6        |
| 13               | 14               |                 |                 | 13       | 14       |
| 13               | 9                |                 |                 | 13       | 9        |

Tabelle1

|    |    |     |    |
|----|----|-----|----|
| 6  | 5  | 6   | 5  |
| 8  | 39 | 8   | 39 |
| 49 | 13 | 49  | 13 |
| 23 | 25 | 23  | 25 |
| 6  | 6  | 6   | 6  |
| 9  | 20 | 9   | 20 |
| 8  | 35 | 8   | 35 |
| 21 | 6  | 21  | 6  |
| 31 | 3  | 31  | 3  |
| 46 | 30 | 46  | 30 |
| 11 | 6  | 11  | 6  |
| 77 | 24 | 77  | 24 |
| 14 | 10 | 14  | 10 |
| 30 | 22 | 30  | 22 |
| 54 | 22 | 54  | 22 |
| 3  | 29 | 3   | 29 |
| 29 | 38 | 29  | 38 |
| 23 | 24 | 23  | 24 |
| 30 | 3  | 30  | 3  |
| 25 | 13 | 25  | 13 |
| 32 | 15 | 32  | 15 |
| 7  | 5  | 7   | 5  |
| 67 | 30 | 67  | 30 |
| 15 | 10 | 15  | 10 |
| 4  | 8  | 4   | 8  |
| 4  | 48 | 4   | 48 |
| 13 | 36 | 13  | 36 |
| 14 | 15 | 14  | 15 |
| 12 | 4  | 12  | 4  |
| 4  | 28 | 4   | 28 |
| 4  | 17 | 4   | 17 |
| 3  | 4  | 3   | 4  |
| 3  | 6  | 3   | 6  |
|    | 8  | 5   | 8  |
|    | 4  | 6   | 4  |
|    | 21 | 6   | 21 |
|    | 3  | 35  | 3  |
|    | 13 | 19  | 13 |
|    | 19 | 111 | 19 |
|    | 13 | 27  | 13 |
|    | 3  | 17  | 3  |
|    | 3  | 8   | 3  |
|    | 3  | 5   | 3  |
|    | 14 | 25  | 14 |
|    | 2  | 4   | 2  |
|    | 3  | 3   | 3  |
|    | 11 | 3   | 11 |
|    | 4  | 10  | 4  |
|    | 5  | 8   | 5  |
|    | 13 | 36  | 13 |
|    | 12 | 11  | 12 |
|    | 3  | 17  | 3  |
|    | 5  | 7   | 5  |
|    | 4  | 28  | 4  |
|    | 18 | 21  | 18 |
|    | 4  | 16  | 4  |

Tabelle1

|    |    |
|----|----|
| 4  | 7  |
| 36 | 3  |
| 17 | 14 |
| 32 | 3  |
| 7  | 15 |
| 12 | 16 |
|    | 3  |
|    | 24 |
|    | 47 |
|    | 11 |
|    | 8  |
|    | 55 |
|    | 12 |
|    | 35 |
|    | 16 |
|    | 8  |
|    | 36 |
|    | 10 |
|    | 6  |
|    | 20 |
|    | 15 |
|    | 8  |
|    | 18 |
|    | 3  |
|    | 3  |
|    | 7  |
|    | 5  |
|    | 3  |
|    | 3  |
|    | 3  |
|    | 7  |
|    | 31 |
|    | 4  |
|    | 67 |
|    | 10 |
|    | 7  |
|    | 4  |
|    | 22 |
|    | 20 |
|    | 4  |
