# Supplementary material for: The Demand for Elective Neurosurgery at a German University Hospital during the First Wave of COVID-19
Source: MDPI journal article supplement (doi:10.3390/healthcare8040483), 2020-11-13
Supplement: s1 [file s1]

Tabelle1

| day | confirmed_covid_cases_RKI | gov_action_2020 |
|-----|---------------------------|-----------------|
| 1   | NA                        | NA              |
| 2   | NA                        | NA              |
| 3   | NA                        | NA              |
| 4   | NA                        | NA              |
| 5   | NA                        | NA              |
| 6   | NA                        | NA              |
| 7   | NA                        | NA              |
| 8   | NA                        | NA              |
| 9   | NA                        | NA              |
| 10  | NA                        | NA              |
| 11  | NA                        | NA              |
| 12  | NA                        | NA              |
| 13  | NA                        | NA              |
| 14  | NA                        | NA              |
| 15  | NA                        | NA              |
| 16  | NA                        | NA              |
| 17  | NA                        | NA              |
| 18  | NA                        | NA              |
| 19  | NA                        | NA              |
| 20  | NA                        | NA              |
| 21  | NA                        | NA              |
| 22  | NA                        | NA              |
| 23  | NA                        | NA              |
| 24  | NA                        | NA              |
| 25  | NA                        | NA              |
| 26  | NA                        | NA              |
| 27  | NA                        | NA              |
| 28  | NA                        | NA              |
| 29  | NA                        | NA              |
| 30  | NA                        | NA              |
| 31  | NA                        | NA              |
| 32  | NA                        | NA              |
| 33  | NA                        | NA              |
| 34  | NA                        | NA              |
| 35  | NA                        | NA              |
| 36  | NA                        | NA              |
| 37  | NA                        | NA              |
| 38  | NA                        | NA              |
| 39  | NA                        | NA              |
| 40  | NA                        | NA              |
| 41  | NA                        | NA              |
| 42  | NA                        | NA              |
| 43  | NA                        | NA              |
| 44  | NA                        | NA              |
| 45  | NA                        | NA              |
| 46  | NA                        | NA              |
| 47  | NA                        | NA              |
| 48  | NA                        | NA              |
| 49  | NA                        | NA              |
| 50  | NA                        | NA              |
| 51  | NA                        | NA              |
| 52  | NA                        | NA              |
| 53  | NA                        | NA              |
| 54  | NA                        | NA              |
| 55  | NA                        | NA              |

Tabelle1

|       |        |   |
|-------|--------|---|
| 56 NA | NA     |   |
| 57 NA | NA     |   |
| 58 NA | NA     |   |
| 59 NA | NA     |   |
| 60 NA | NA     |   |
| 61 NA | NA     |   |
| 62 NA | NA     |   |
| 63 NA | NA     |   |
| 64    | 262    | 0 |
| 65    | 400    | 0 |
| 66    | 639    | 0 |
| 67    | 795    | 0 |
| 68    | 902    | 0 |
| 69    | 1139   | 0 |
| 70    | 1296   | 0 |
| 71    | 1567   | 0 |
| 72    | 2369   | 1 |
| 73    | 3062   | 0 |
| 74    | 3795   | 0 |
| 75    | 4838   | 0 |
| 76    | 6012   | 1 |
| 77    | 7156   | 0 |
| 78    | 8198   | 0 |
| 79    | 10999  | 0 |
| 80    | 13957  | 0 |
| 81    | 16662  | 0 |
| 82    | 18610  | 0 |
| 83    | 22672  | 0 |
| 84    | 27436  | 0 |
| 85    | 31554  | 0 |
| 86    | 36508  | 0 |
| 87    | 42288  | 0 |
| 88    | 48582  | 0 |
| 89    | 52547  | 0 |
| 90    | 57298  | 0 |
| 91    | 61913  | 0 |
| 92    | 67366  | 0 |
| 93    | 73522  | 0 |
| 94    | 79696  | 0 |
| 95    | 85778  | 0 |
| 96    | 91714  | 0 |
| 97    | 95391  | 0 |
| 98    | 99225  | 0 |
| 99    | 103228 | 0 |
| 100   | 108202 | 0 |
| 101   | 113525 | 0 |
| 102   | 117658 | 0 |
| 103   | 120479 | 0 |
| 104   | 123016 | 0 |
| 105   | 125098 | 0 |
| 106   | 127584 | 0 |
| 107   | 130450 | 0 |
| 108   | 133830 | 0 |
| 109   | 137439 | 0 |
| 110   | 139897 | 0 |
| 111   | 141672 | 0 |

Tabelle1

|     |        |   |
|-----|--------|---|
| 112 | 143457 | 0 |
| 113 | 145694 | 0 |
| 114 | 148046 | 0 |
| 115 | 150383 | 0 |
| 116 | 152438 | 0 |
| 117 | 154175 | 0 |
| 118 | 155193 | 0 |
| 119 | 156337 | 0 |
| 120 | 157641 | 0 |
| 121 | 159119 | 0 |
| 122 | 160758 | 0 |
| 123 | 161703 | 0 |
| 124 | 162496 | 0 |
| 125 | 163175 | 0 |
| 126 | 163860 | 0 |
| 127 | 164807 | 0 |
| 128 | 166091 | 0 |
| 129 | 167300 | 0 |
| 130 | 168551 | 0 |
| 131 | 169218 | 0 |
| 132 | 169575 | 0 |
| 133 | 170508 | 0 |
| 134 | 171306 | 0 |
| 135 | 172239 | 0 |
| 136 | 173152 | 0 |
| 137 | 173772 | 0 |
| 138 | 174355 | 0 |
| 139 | 174697 | 0 |
| 140 | 175210 | 0 |
| 141 | 176007 | 0 |
| 142 | 176752 | 0 |
| 143 | 177212 | 0 |
| 144 | 177850 | 0 |
| 145 | 178281 | 0 |
| 146 | 178570 | 0 |
| 147 | 179002 | 0 |
| 148 | 179364 | 0 |
| 149 | 179717 | 0 |
| 150 | 180458 | 0 |
| 151 | 181196 | 0 |
| 152 | 181482 | 0 |
| 153 | 181805 | 0 |
| 154 | 182028 | 0 |
| 155 | 182370 | 0 |
| 156 | 182764 | 0 |
| 157 | 183271 | 0 |
| 158 | 183678 | 0 |
| 159 | 183979 | 0 |
| 160 | 184193 | 0 |
| 161 | 184543 | 0 |
| 162 | 184861 | 0 |
| 163 | 185416 | 0 |
| 164 | 185674 | 0 |
| 165 | 186022 | 0 |
| 166 | 186269 | 0 |
| 167 | 186461 | 0 |

Tabelle1

|     |        |   |
|-----|--------|---|
| 168 | 186839 | 0 |
| 169 | 187184 | 0 |
| 170 | 187764 | 0 |
| 171 | 188534 | 0 |
| 172 | 189135 | 0 |
| 173 | 189822 | 0 |
| 174 | 190359 | 0 |
| 175 | 190862 | 0 |
| 176 | 191449 | 0 |
| 177 | 192079 | 0 |
| 178 | 192556 | 0 |
| 179 | 193243 | 0 |
| 180 | 193449 | 0 |
| 181 | 193761 | 0 |
| 182 | 194259 | 0 |
