# Supplementary material for: The Demand for Elective Neurosurgery at a German University Hospital during the First Wave of COVID-19
Source: MDPI journal article supplement (doi:10.3390/healthcare8040483), 2020-11-13
Supplement: s1 [file s1]

Tabelle1

| day | all_ep_2019 | all_ep_2020 | onco_ep_2019 | onco_ep_2020 |
|-----|-------------|-------------|--------------|--------------|
| 1   | 0           | 0           | 0            | 0            |
| 2   | 4           | 3           | 2            | 0            |
| 3   | 4           | 2           | 1            | 1            |
| 4   | 4           | 0           | 1            | 0            |
| 5   | 0           | 0           | 0            | 0            |
| 6   | 0           | 3           | 0            | 2            |
| 7   | 5           | 3           | 2            | 0            |
| 8   | 5           | 3           | 1            | 1            |
| 9   | 5           | 3           | 2            | 1            |
| 10  | 4           | 3           | 1            | 1            |
| 11  | 4           | 0           | 1            | 0            |
| 12  | 0           | 0           | 0            | 0            |
| 13  | 0           | 4           | 0            | 1            |
| 14  | 5           | 4           | 3            | 3            |
| 15  | 3           | 4           | 1            | 1            |
| 16  | 3           | 4           | 0            | 1            |
| 17  | 4           | 3           | 1            | 2            |
| 18  | 4           | 0           | 0            | 0            |
| 19  | 0           | 0           | 0            | 0            |
| 20  | 0           | 3           | 0            | 1            |
| 21  | 4           | 3           | 3            | 1            |
| 22  | 3           | 4           | 2            | 1            |
| 23  | 4           | 4           | 0            | 3            |
| 24  | 3           | 5           | 1            | 2            |
| 25  | 5           | 0           | 3            | 0            |
| 26  | 0           | 0           | 0            | 0            |
| 27  | 0           | 5           | 0            | 5            |
| 28  | 4           | 4           | 2            | 0            |
| 29  | 4           | 3           | 1            | 3            |
| 30  | 5           | 3           | 3            | 2            |
| 31  | 3           | 3           | 2            | 1            |
| 32  | 5           | 0           | 3            | 0            |
| 33  | 0           | 0           | 0            | 0            |
| 34  | 0           | 4           | 0            | 0            |
| 35  | 3           | 2           | 2            | 1            |
| 36  | 3           | 4           | 0            | 1            |
| 37  | 2           | 4           | 0            | 2            |
| 38  | 3           | 3           | 3            | 1            |
| 39  | 3           | 0           | 1            | 0            |
| 40  | 0           | 0           | 0            | 0            |
| 41  | 0           | 3           | 0            | 2            |
| 42  | 4           | 4           | 2            | 1            |
| 43  | 4           | 4           | 1            | 3            |
| 44  | 3           | 6           | 1            | 2            |
| 45  | 3           | 3           | 1            | 0            |
| 46  | 5           | 0           | 1            | 0            |
| 47  | 0           | 0           | 0            | 0            |
| 48  | 0           | 4           | 0            | 1            |
| 49  | 5           | 4           | 3            | 1            |
| 50  | 5           | 3           | 3            | 1            |
| 51  | 4           | 4           | 3            | 1            |
| 52  | 4           | 3           | 1            | 2            |
| 53  | 3           | 0           | 1            | 0            |
| 54  | 0           | 0           | 0            | 0            |
| 55  | 0           | 3           | 0            | 1            |

Tabelle1

|     |   |   |   |   |
|-----|---|---|---|---|
| 56  | 3 | 4 | 1 | 1 |
| 57  | 5 | 2 | 4 | 0 |
| 58  | 4 | 4 | 0 | 2 |
| 59  | 4 | 4 | 0 | 1 |
| 60  | 4 | 0 | 0 | 0 |
| 61  | 0 | 0 | 0 | 0 |
| 62  | 0 | 4 | 0 | 1 |
| 63  | 4 | 3 | 1 | 2 |
| 64  | 5 | 3 | 2 | 1 |
| 65  | 4 | 3 | 0 | 1 |
| 66  | 6 | 3 | 1 | 1 |
| 67  | 2 | 0 | 1 | 0 |
| 68  | 0 | 0 | 0 | 0 |
| 69  | 0 | 2 | 0 | 2 |
| 70  | 4 | 4 | 2 | 3 |
| 71  | 5 | 3 | 0 | 1 |
| 72  | 2 | 5 | 0 | 2 |
| 73  | 4 | 4 | 1 | 1 |
| 74  | 4 | 0 | 0 | 0 |
| 75  | 0 | 0 | 0 | 0 |
| 76  | 0 | 4 | 0 | 1 |
| 77  | 4 | 4 | 3 | 2 |
| 78  | 4 | 4 | 2 | 1 |
| 79  | 4 | 4 | 1 | 1 |
| 80  | 3 | 4 | 0 | 2 |
| 81  | 4 | 0 | 1 | 0 |
| 82  | 0 | 0 | 0 | 0 |
| 83  | 0 | 4 | 0 | 2 |
| 84  | 4 | 2 | 2 | 2 |
| 85  | 4 | 4 | 2 | 3 |
| 86  | 4 | 4 | 0 | 2 |
| 87  | 4 | 3 | 3 | 2 |
| 88  | 4 | 0 | 2 | 0 |
| 89  | 0 | 0 | 0 | 0 |
| 90  | 0 | 2 | 0 | 2 |
| 91  | 4 | 4 | 2 | 1 |
| 92  | 6 | 4 | 4 | 1 |
| 93  | 3 | 4 | 2 | 0 |
| 94  | 5 | 1 | 2 | 0 |
| 95  | 4 | 0 | 0 | 0 |
| 96  | 0 | 0 | 0 | 0 |
| 97  | 0 | 3 | 0 | 2 |
| 98  | 5 | 2 | 3 | 1 |
| 99  | 3 | 3 | 3 | 2 |
| 100 | 5 | 4 | 0 | 2 |
| 101 | 5 | 0 | 3 | 0 |
| 102 | 4 | 0 | 2 | 0 |
| 103 | 0 | 0 | 0 | 0 |
| 104 | 0 | 0 | 0 | 0 |
| 105 | 6 | 3 | 3 | 3 |
| 106 | 5 | 3 | 4 | 2 |
| 107 | 4 | 4 | 1 | 3 |
| 108 | 4 | 2 | 1 | 1 |
| 109 | 0 | 0 | 0 | 0 |
| 110 | 0 | 0 | 0 | 0 |
| 111 | 0 | 3 | 0 | 0 |

Tabelle1

|     |   |   |   |   |
|-----|---|---|---|---|
| 112 | 0 | 2 | 0 | 0 |
| 113 | 4 | 4 | 1 | 3 |
| 114 | 3 | 2 | 1 | 1 |
| 115 | 3 | 3 | 1 | 1 |
| 116 | 5 | 0 | 0 | 0 |
| 117 | 0 | 0 | 0 | 0 |
| 118 | 0 | 3 | 0 | 3 |
| 119 | 3 | 5 | 0 | 2 |
| 120 | 5 | 3 | 1 | 2 |
| 121 | 0 | 4 | 0 | 2 |
| 122 | 4 | 0 | 1 | 0 |
| 123 | 3 | 0 | 1 | 0 |
| 124 | 0 | 0 | 0 | 0 |
| 125 | 0 | 2 | 0 | 1 |
| 126 | 4 | 1 | 1 | 0 |
| 127 | 4 | 4 | 3 | 1 |
| 128 | 4 | 2 | 0 | 1 |
| 129 | 5 | 3 | 1 | 1 |
| 130 | 3 | 0 | 0 | 0 |
| 131 | 0 | 0 | 0 | 0 |
| 132 | 0 | 5 | 0 | 1 |
| 133 | 5 | 4 | 2 | 0 |
| 134 | 3 | 1 | 0 | 1 |
| 135 | 4 | 3 | 1 | 1 |
| 136 | 3 | 3 | 1 | 0 |
| 137 | 4 | 0 | 2 | 0 |
| 138 | 0 | 0 | 0 | 0 |
| 139 | 0 | 4 | 0 | 1 |
| 140 | 3 | 3 | 1 | 3 |
| 141 | 2 | 4 | 0 | 1 |
| 142 | 3 | 0 | 1 | 0 |
| 143 | 5 | 2 | 1 | 1 |
| 144 | 5 | 0 | 2 | 0 |
| 145 | 0 | 0 | 0 | 0 |
| 146 | 0 | 5 | 0 | 2 |
| 147 | 4 | 3 | 3 | 0 |
| 148 | 4 | 3 | 2 | 1 |
| 149 | 5 | 3 | 1 | 1 |
| 150 | 0 | 4 | 0 | 2 |
| 151 | 4 | 0 | 1 | 0 |
| 152 | 0 | 0 | 0 | 0 |
| 153 | 0 | 0 | 0 | 0 |
| 154 | 4 | 3 | 2 | 3 |
| 155 | 4 | 3 | 2 | 0 |
| 156 | 4 | 4 | 1 | 3 |
| 157 | 4 | 4 | 1 | 3 |
| 158 | 2 | 0 | 1 | 0 |
| 159 | 0 | 0 | 0 | 0 |
| 160 | 0 | 4 | 0 | 1 |
| 161 | 0 | 4 | 0 | 2 |
| 162 | 4 | 5 | 2 | 3 |
| 163 | 5 | 0 | 3 | 0 |
| 164 | 3 | 3 | 1 | 0 |
| 165 | 3 | 0 | 1 | 0 |
| 166 | 0 | 0 | 0 | 0 |
| 167 | 0 | 4 | 0 | 0 |

Tabelle1

|     |   |   |   |   |
|-----|---|---|---|---|
| 168 | 2 | 3 | 0 | 3 |
| 169 | 2 | 2 | 1 | 1 |
| 170 | 4 | 3 | 2 | 1 |
| 171 | 0 | 2 | 0 | 1 |
| 172 | 3 | 0 | 1 | 0 |
| 173 | 0 | 0 | 0 | 0 |
| 174 | 0 | 3 | 0 | 2 |
| 175 | 3 | 4 | 2 | 2 |
| 176 | 4 | 3 | 2 | 1 |
| 177 | 3 | 3 | 1 | 1 |
| 178 | 3 | 4 | 0 | 1 |
| 179 | 2 | 0 | 1 | 0 |
| 180 | 0 | 0 | 0 | 0 |
| 181 | 0 | 3 | 0 | 1 |
| 182 |   | 4 |   | 2 |
